# Supplementary material
Source: PubMed Central journal article supplement (PMC8339511)
Supplement: lic-0010-0346-s01.pdf [file lic-0010-0346-s01.pdf]

## **Supplementary Methods and Materials**

### **Published gene signatures that may be associated with response to immune checkpoint inhibitor (ICI) therapy**

The following gene signatures were used in the present study to evaluate their predictive and prognostic values for HCC patients who receive ICI therapy:

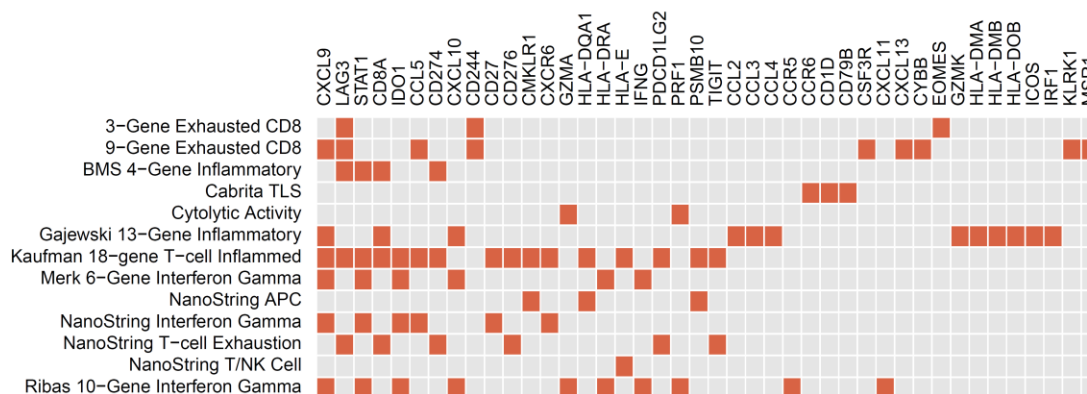

The TIDE score was calculated using the online tool (<http://tide.dfci.harvard.edu/>) where the parameter of cancer type was set as ‘other’ (1). The IMPRES score were calculated as previously described (2). IMPRES encompasses 15 pairwise transcriptomics relations between immune checkpoint genes. Because CD137L and VISTA were not profiled by the NanoString PanCancer Immune Profiling panel, only 13 pairwise genes were used for scoring IMPRES in our ICI therapy cohort. The prediction value of PD-L1 was evaluated in our study using the PD-L1(CD274) gene expression. The prediction values of other signatures published in the literature were the average values among all members (3-8).

### **β-catenin analysis**

DNA was extracted using the truXTRAC® FFPE total NA Kits (Covaris). Exon 3 of CTNNB1 was amplified using the following primers: 5’-CAATGGGTCATATCACAGATTCTT-3’ and 5’-TCTCTTTTCTTCACCACAACATTT-3’. Direct sequencing was performed to detect mutations by using an ABI PRISM 3730xl DNA Analyzer. The immunohistochemistry staining of β-catenin and glutamine synthetase was performed as previous described (9)

### **Immune subtypes**

The immune class of the ICI treatment cohort was determined as previous described (10). In accordance with the manufacturer's instructions, CIBERSORT analysis of mRNA expression data of the ICI treatment cohort was performed in the Absolute mode with LM22 signature matrix on the web (<https://cibersort.stanford.edu/>) (11)

## **Supplementary Tables**

**Supplementary Table 1. Antibodies used to measure CD8 T cell exhaustion by multiplex immunofluorescence staining.**

| Antibody Target | Clone                                  | Dilution | Fluorophore |
|-----------------|----------------------------------------|----------|-------------|
| anti-CD8        | Cat# 790-4460, clone SP57, Roche       | 1:1      | Opal 570    |
| anti-PD1        | Cat# 760-4895, clone NAT105, Roche     | 1:1      | Opal 690    |
| anti-LAG3       | Cat# AC-0294, clone EP294, Cell marque | 1:100    | Opal 520    |

**Supplementary Table 2** Clinico-pathological characteristics of the ICI therapy cohort

| Characteristics                    | All patients (%) | Patients with adequate tumor sample for biomarker analysis |                | <i>p</i> value*    |
|------------------------------------|------------------|------------------------------------------------------------|----------------|--------------------|
|                                    |                  | Discovery (%)                                              | Validation (%) |                    |
| No. of patients                    | 61               | 24                                                         | 18             |                    |
| Age                                |                  |                                                            |                | 0.35               |
| ≤ 60 years                         | 29 (47.5)        | 12 (50)                                                    | 6 (33.3)       |                    |
| > 60 years                         | 32 (52.5)        | 12 (50)                                                    | 12 (66.7)      |                    |
| Sex                                |                  |                                                            |                | 1.00               |
| Men                                | 53 (86.9)        | 22 (91.7)                                                  | 16 (88.9)      |                    |
| Women                              | 8 (12.9)         | 2 (8.3)                                                    | 2 (11.1)       |                    |
| Etiology                           |                  |                                                            |                | 1.00               |
| HBV                                | 48 (78.7)        | 19 (79.2)                                                  | 13 (72.2)      |                    |
| HCV                                | 8 (13.1)         | 3 (12.5)                                                   | 3 (16.7)       |                    |
| Other                              | 5 (8.2)          | 2 (8.3)                                                    | 2 (11.1)       |                    |
| ALBI grade                         |                  |                                                            |                | 0.51               |
| 1                                  | 42 (68.9)        | 16 (66.7)                                                  | 14 (77.8)      |                    |
| 2                                  | 19 (31.1)        | 8 (33.3)                                                   | 4 (22.2)       |                    |
| NLR                                |                  |                                                            |                | 0.75               |
| ≤ 3                                | 33 (54.1)        | 15 (62.5)                                                  | 10 (55.6)      |                    |
| > 3                                | 28 (45.9)        | 9 (31.5)                                                   | 8 (44.4)       |                    |
| AFP (ng/ml)                        |                  |                                                            |                | 0.54               |
| ≤ 100                              | 32 (52.5)        | 12 (50.0)                                                  | 11 (61.1)      |                    |
| > 100                              | 29 (47.5)        | 12 (50.0)                                                  | 7 (38.9)       |                    |
| Macrovascular invasion             |                  |                                                            |                | <b>0.04</b>        |
| No                                 | 42 (68.9)        | 14 (58.3)                                                  | 16 (88.9)      |                    |
| Yes                                | 19 (31.1)        | 10 (41.7)                                                  | 2 (11.1)       |                    |
| Extra-hepatic spread               |                  |                                                            |                | 0.57               |
| No                                 | 7 (11.5)         | 1 (4.2)                                                    | 2 (11.1)       |                    |
| Yes                                | 54 (88.5)        | 23 (95.8)                                                  | 16 (88.9)      |                    |
| Liver tumor volume#                |                  |                                                            |                | 1.00               |
| > 50%                              |                  |                                                            |                |                    |
| No                                 | 56 (91.8)        | 23 (95.8)                                                  | 17 (94.4)      |                    |
| Yes                                | 5 (8.2)          | 1 (4.2)                                                    | 1 (5.6)        |                    |
| Prior systemic therapy             |                  |                                                            |                | <b>&lt; 0.0001</b> |
| None                               | 19 (31.1)        | 2 (8.3)                                                    | 10 (55.6)      |                    |
| 1 <sup>st</sup> -line              | 27 (44.3)        | 10 (41.7)                                                  | 8 (44.4)       |                    |
| 2 <sup>nd</sup> -line              | 15 (24.6)        | 12 (50.0)                                                  | 0 (0.0)        |                    |
| Response to prior systemic therapy |                  |                                                            |                | <b>0.004</b>       |
| No treatment                       | 19 (31.1)        | 2 (8.4)                                                    | 10 (55.6)      |                    |
| SD                                 | 21 (34.4)        | 11 (45.8)                                                  | 4 (21.1)       |                    |
| PD                                 | 21 (34.4)        | 11 (45.8)                                                  | 4 (21.4)       |                    |
| Therapeutic regimen                |                  |                                                            |                | 1.00               |
| Single-agent anti-PD1/ anti-PD-L1  | 28 (45.9)        | 13 (54.2)                                                  | 9 (50.0)       |                    |
| Anti-PD1/ anti-PD-L1-based         | 33 (54.1)        | 11 (45.8)                                                  | 9 (40.0)       |                    |

|                    |                      |             |            |      |
|--------------------|----------------------|-------------|------------|------|
| combination        |                      |             |            |      |
| Objective response |                      |             |            | 0.12 |
| PD/SD              | 18/19 (60.7)         | 8/10 (75.0) | 4/5 (50.0) |      |
| PR/CR              | 22/1 (37.7)          | 6/0 (25.0)  | 8/1 (50.0) |      |
| Not evaluable      | 1 <sup>@</sup> (1.6) | 0 (0.0)     | 0 (0.0)    |      |

ALBI grade: albumin-bilirubin grade

NLR: neutrophil-lymphocyte ratio

AFP: alpha-fetoprotein level

\* Fisher's exact test was used to assess the difference between the discovery and validation cohorts.

The result was in bold, if  $p < 0.05$

#: Estimated percentage of liver volume

@: The patient died after 1 cycle of ICI-based combination therapy without formal evaluation of response by imaging.

**Supplementary Table 3.** The regimen of immune checkpoint inhibitor (ICI)-based regimens used for subjects in the discovery and validation cohorts.

| Discovery cohort |                      |                                          | Validation cohort |                           |                                          |
|------------------|----------------------|------------------------------------------|-------------------|---------------------------|------------------------------------------|
| Subject no.      | ICI-based regimen    | Time from tumor sample collection (year) | Subject no.       | ICI-based regimen         | Time from tumor sample collection (year) |
| S01              | Nivolumab+Ipilimumab | 0.1                                      | V02               | Codrituzumab+Atezolizumab | 0.7                                      |
| S02              | Nivolumab+Ipilimumab | 2.7                                      | V04               | Durvalumab                | 4.4                                      |
| S03              | Nivolumab+Ipilimumab | 1.2                                      | V05               | Durvalumab                | 0.2                                      |
| S06              | Nivolumab+Ipilimumab | 1.5                                      | V06               | Atezolizumab+Bevacizumab  | 4.3                                      |
| S08              | Nivolumab+Ipilimumab | 1.5                                      | V07               | Atezolizumab+Bevacizumab  | 1.6                                      |
| S10              | Nivolumab+Ipilimumab | 2.1                                      | V10               | Atezolizumab+Bevacizumab  | 0                                        |
| S11              | Nivolumab+Ipilimumab | 0.4                                      | V12               | Atezolizumab+Bevacizumab  | 3.1                                      |
| S12              | Nivolumab+Ipilimumab | 0                                        | V13               | Atezolizumab              | 0.9                                      |
| S14              | Nivolumab+Ipilimumab | 2                                        | V14               | Atezolizumab              | 0.5                                      |
| S16              | PDR001+MBG453        | 0                                        | V16               | Atezolizumab              | 0.3                                      |
| S17              | PDR001+MBG453        | 2.8                                      | V17               | Atezolizumab              | 0.2                                      |
| S18              | Nivolumab            | 5.6                                      | V18               | INC280+PDR001             | 1.2                                      |
| S19              | Nivolumab            | 1                                        | V19               | INC280+PDR001             | 0.5                                      |
| S20              | Nivolumab            | 6.2                                      | V22               | BGB-A317                  | 1.3                                      |
| S21              | Nivolumab            | 2.2                                      | V23               | BGB-A317                  | 0.9                                      |
| S22              | Nivolumab            | 1.4                                      | V25               | GT90001+Nivolumab         | 0.3                                      |
| S23              | Nivolumab            | 2.1                                      | V27               | GT90001+Nivolumab         | 0.7                                      |
| S24              | Nivolumab            | 3.7                                      | V29               | Nivolumab                 | 0.1                                      |
| S25              | Nivolumab            | 2.9                                      |                   |                           |                                          |
| S26              | Nivolumab            | 0.1                                      |                   |                           |                                          |
| S27              | Nivolumab            | 0.1                                      |                   |                           |                                          |
| S29              | Nivolumab            | 0.3                                      |                   |                           |                                          |
| S30              | Nivolumab            | 12                                       |                   |                           |                                          |
| S31              | Nivolumab            | 0.4                                      |                   |                           |                                          |

**Supplementary Table 4.** Odd ratios of various clinical-pathologic characteristics for objective response to ICI therapy

| Characteristics<br>N = 61                               | Objective response to ICI therapy |                 |
|---------------------------------------------------------|-----------------------------------|-----------------|
|                                                         | OR (95% IC)                       | <i>p</i> value* |
| Age ( $\leq 60$ vs. $> 60$ years)                       | 1.03 (0.32-3.33)                  | 1.00            |
| Sex (women vs. men)                                     | 0.96 (0.13-5.58)                  | 1.00            |
| Etiology (other etiologies vs. HBV)                     | 0.55 (0.12-2.42)                  | 0.51            |
| ALBI grade (1 vs. 2)                                    | 0.52 (0.12-1.92)                  | 0.39            |
| NLR ( $\leq 3$ vs. $> 3$ )                              | 1.20 (0.37-3.97)                  | 0.79            |
| AFP ( $\leq 100$ vs. $> 100$ ng/ml)                     | 2.51 (0.77-8.57)                  | 0.11            |
| Macrovascular invasion (No vs. Yes)                     | 0.91 (0.24-3.18)                  | 1.00            |
| Extra-hepatic spread (No vs. Yes)                       | 0.43 (0.06-2.81)                  | 0.41            |
| Liver tumor volume# ( $\leq 50\%$ vs. $> 50\%$ )        | 1.65 (0.11-24.4)                  | 0.63            |
| Prior systemic therapy (No vs. 1 or more prior therapy) | 0.70 (0.20-2.52)                  | 0.57            |

\* the *p*-values were derived from Fisher's exact test

# estimated percentage of liver volume

**Supplementary Table 5.** Univariate Cox regression analysis in the ICI therapy cohort

| Characteristics ( <i>n</i> ) | Progression-free survival |                 | Overall survival |                 |
|------------------------------|---------------------------|-----------------|------------------|-----------------|
|                              | HR (95% IC)               | <i>p</i> value* | HR (95% IC)      | <i>p</i> value* |
| N = 61                       | Events = 44               |                 | Events = 39      |                 |
| Age                          |                           |                 |                  |                 |
| ≤ 60 years (29)              | Ref                       |                 | Ref              |                 |
| > 60 years (32)              | 0.81 (0.45-1.47)          | 0.49            | 1.24 (0.65-2.35) | 0.52            |
| Sex                          |                           |                 |                  |                 |
| Men (53)                     | Ref                       |                 | Ref              |                 |
| Women (8)                    | 1.65 (0.73-3.72)          | 0.23            | 1.28 (0.53-3.06) | 0.58            |
| Etiology                     |                           |                 |                  |                 |
| HBV (48)                     | Ref                       |                 | Ref              |                 |
| HCV (8)                      | 0.28 (0.07-1.15)          | 0.08            | 1.18 (0.46-3.06) | 0.73            |
| Other (5)                    | 1.45 (0.51-4.09)          | 0.48            | 1.50 (0.52-4.30) | 0.44            |
| ALBI grade                   |                           |                 |                  |                 |
| 1 (42)                       | Ref                       |                 | Ref              |                 |
| 2 (19)                       | 1.33 (0.70-2.53)          | 0.37            | 1.92 (1.01-3.66) | <b>0.047</b>    |
| NLR                          |                           |                 |                  |                 |
| ≤ 3 (33)                     | Ref                       |                 | Ref              |                 |
| > 3 (28)                     | 1.03 (0.56-1.86)          | 0.94            | 1.28 (0.68-2.40) | 0.44            |
| AFP (ng/ml)                  |                           |                 |                  |                 |
| ≤ 100 (32)                   | Ref                       |                 | Ref              |                 |
| > 100 (29)                   | 1.00 (0.55-1.81)          | 1.00            | 1.41 (0.75-2.66) | 0.29            |
| Macrovascular invasion       |                           |                 |                  |                 |
| No (42)                      | Ref                       |                 | Ref              |                 |
| Yes (19)                     | 1.12 (0.60-2.11)          | 0.73            | 1.40 (0.72-2.70) | 0.32            |
| Extra-hepatic spread         |                           |                 |                  |                 |
| No (7)                       | Ref                       |                 | Ref              |                 |
| Yes (54)                     | 2.48 (0.76-8.02)          | 0.13            | 1.91 (0.59-6.22) | 0.28            |
| Liver tumor volume > 50%     |                           |                 |                  |                 |
| No (56)                      | Ref                       |                 | Ref              |                 |
| Yes (5)                      | 0.61 (0.15-2.52)          | 0.49            | 1.54 (0.47-5.03) | 0.48            |
| Prior systemic therapy       |                           |                 |                  |                 |
| None (19)                    | Ref                       |                 | Ref              |                 |
| 1 or more lines (42)         | 1.58 (0.81-3.09)          | 0.18            | 1.41 (0.65-3.04) | 0.38            |

\* The result was in bold, if  $p < 0.05$

**Supplementary Table 6.** Bivariate Cox regression analysis in the ICI therapy discovery cohort to evaluate the predictive value of the 9-gene exhausted CD8 T cell signature in different clinico-pathological sub-groups.

| Characteristics          | Progression-free survival |                 | Overall survival |                 |
|--------------------------|---------------------------|-----------------|------------------|-----------------|
|                          | HR (95% IC)               | <i>p</i> value* | HR (95% IC)      | <i>p</i> value* |
| N = 24                   | Event = 21                |                 | Event = 21       |                 |
| 9-gene Exhausted CD8     | 0.44 (0.24-0.84)          | <b>0.012</b>    | 0.39 (0.19-0.81) | <b>0.012</b>    |
| Age                      |                           |                 |                  |                 |
| ≤ 60 years               | Ref                       |                 | Ref              |                 |
| > 60 years               | 1.17 (0.48-2.86)          | 0.73            | 1.76 (0.72-4.29) |                 |
| 9-gene Exhausted CD8     | 0.47 (0.24-0.89)          | <b>0.019</b>    | 0.43 (0.20-0.90) | <b>0.025</b>    |
| Sex                      |                           |                 |                  |                 |
| Men                      | Ref                       |                 | Ref              |                 |
| Women                    | 3.86 (0.69-21.5)          | 0.12            | 2.02(0.41-9.99)  | 0.39            |
| 9-gene Exhausted CD8     | 0.42 (0.20-0.87)          | <b>0.019</b>    | 0.39 (0.18-0.83) | <b>0.014</b>    |
| Etiology                 |                           |                 |                  |                 |
| HBV                      | Ref                       |                 | Ref              |                 |
| HCV                      | 1.48 (0.28-7.83)          | 0.64            | 1.32 (0.28-6.21) | 0.73            |
| Other                    | 2.12 (0.46-9.81)          | 0.34            | 0.65 (0.14-2.89) | 0.57            |
| 9-gene Exhausted CD8     | 0.44 (0.23-0.83)          | <b>0.012</b>    | 0.41 (0.20-.85)  | <b>0.017</b>    |
| ALBI grade               |                           |                 |                  |                 |
| 1                        | Ref                       |                 | Ref              |                 |
| 2                        | 0.78 (0.31-1.97)          | 0.59            | 0.92 (0.37-2.31) | 0.86            |
| 9-gene Exhausted CD8     | 0.47 (0.25-0.91)          | <b>0.025</b>    | 0.34 (0.15-0.79) | <b>0.012</b>    |
| NLR                      |                           |                 |                  |                 |
| ≤ 3                      | Ref                       |                 | Ref              |                 |
| > 3                      | 0.74 (0.28-1.93)          | 0.54            | 1.68 (0.63-4.46) | 0.30            |
| 9-gene Exhausted CD8     | 0.41 (0.21-0.78)          | <b>0.007</b>    | 0.34 (0.17-0.75) | <b>0.008</b>    |
| AFP (ng/ml)              |                           |                 |                  |                 |
| ≤ 100                    | Ref                       |                 | Ref              |                 |
| > 100                    | 2.01 (0.79-5.11)          | 0.14            | 2.49 (0.99-6.31) | 0.054           |
| 9-gene Exhausted CD8     | 0.45 (0.24-0.85)          | <b>0.014</b>    | 0.41 (0.20-0.86) | <b>0.018</b>    |
| Macrovascular invasion   |                           |                 |                  |                 |
| No                       | Ref                       |                 | Ref              |                 |
| Yes                      | 1.02 (0.40-2.59)          | 0.96            | 1.08 (0.44-2.65) | 0.88            |
| 9-gene Exhausted CD8     | 0.52 (0.27-0.99)          | <b>0.046</b>    | 0.48 (0.22-1.01) | 0.054           |
| Extra-hepatic spread     |                           |                 |                  |                 |
| No                       | Ref                       |                 | Ref              |                 |
| Yes                      | 1.2e8 (0-Inf)             | 0.99            | 3.4e7 (0-Inf)    | 0.99            |
| 9-gene Exhausted CD8     | 0.46 (0.24-0.87)          | <b>0.017</b>    | 0.42 (0.20-0.88) | <b>0.02</b>     |
| Liver tumor volume > 50% |                           |                 |                  |                 |
| No                       | Ref                       |                 | Ref              |                 |
| Yes                      | 9.87 (0.87-111.9)         | 0.06            | 7.64 (0.69-84.9) | 0.10            |
| 9-gene Exhausted CD8     | 0.40 (0.21-0.76)          | <b>0.0054</b>   | 0.35 (0.16-0.75) | <b>0.007</b>    |
| Prior systemic therapy   |                           |                 |                  |                 |
| None                     | Ref                       |                 | Ref              |                 |
| 1 or more lines          | 0.24 (0.05-1.24)          | 0.088           | 0.24 (0.05-1.25) | 0.090           |



**Supplementary Table 7.** Clinico-pathological features of patients in the ICI therapy cohort who received single-agent ICI and combination ICI therapy

| Characteristics          | Single-agent (%) | Combination (%) | <i>p</i> value* |
|--------------------------|------------------|-----------------|-----------------|
| N                        | 22               | 20              |                 |
| Age                      |                  |                 | 0.58            |
| ≤ 60 years               | 8 (36.4)         | 10 (50)         |                 |
| > 60 years               | 14 (63.6)        | 10 (50)         |                 |
| Sex                      |                  |                 | 1.00            |
| Men                      | 20 (90.9)        | 18 (90.0)       |                 |
| Women                    | 2 (9.1)          | 2 (10.0)        |                 |
| Etiology                 |                  |                 | 0.87            |
| HBV                      | 16 (72.7)        | 16 (80.0)       |                 |
| HCV                      | 4 (18.2)         | 2 (10.0)        |                 |
| Other                    | 2 (9.1)          | 2 (10.0)        |                 |
| ALBI grade               |                  |                 | 0.74            |
| 1                        | 15 (68.2)        | 15 (75.0)       |                 |
| 2                        | 7 (31.8)         | 5 (25.0)        |                 |
| NLR                      |                  |                 | 0.76            |
| ≤ 3                      | 14 (60.9)        | 11 (55.0)       |                 |
| > 3                      | 9 (39.1)         | 9 (45.0)        |                 |
| AFP (ng/ml)              |                  |                 | 0.23            |
| ≤ 100                    | 10 (45.5)        | 13 (65.0)       |                 |
| > 100                    | 12 (54.5)        | 7 (35.0)        |                 |
| Macrovascular invasion   |                  |                 | 0.50            |
| No                       | 17 (77.3)        | 13 (65.0)       |                 |
| Yes                      | 5 (22.7)         | 7 (35.0)        |                 |
| Extra-hepatic spread     |                  |                 | 0.60            |
| No                       | 1 (4.5)          | 2 (10.0)        |                 |
| Yes                      | 21 (95.5)        | 18 (90.0)       |                 |
| Liver tumor volume > 50% |                  |                 | 1.00            |
| No                       | 21 (95.5)        | 19 (95.0)       |                 |
| Yes                      | 1 (4.5)          | 1 (5.0)         |                 |
| Prior systemic therapy   |                  |                 | 0.31            |
| None                     | 8 (36.4)         | 4 (20.0)        |                 |
| 1 or more lines          | 14 (63.6)        | 16 (80.0)       |                 |
| Objective response       |                  |                 | 0.53            |
| PD/SD                    | 6/7 (59.1)       | 6/8 (70.0)      |                 |
| PR/CR                    | 8/1 (40.9)       | 6/0 (30.0)      |                 |

\* Fisher's exact test.

**Supplementary Table 8.** Bivariate Cox regression analysis in the samples with single-agent regimen.

| Characteristics        | Progression-free survival |                 | Overall survival  |                 |
|------------------------|---------------------------|-----------------|-------------------|-----------------|
|                        | HR (95% IC)               | <i>p</i> value* | HR (95% IC)       | <i>p</i> value* |
| N = 22                 | Event = 18                |                 | Event = 17        |                 |
| 9-gene Exhausted CD8   | 0.45 (0.25-0.81)          | <b>0.008</b>    | 0.62 (0.35-1.12)  | 0.11            |
| Age                    |                           |                 |                   |                 |
| ≤ 60                   | Ref                       |                 | Ref               |                 |
| > 60                   | 1.29 (0.49-3.39)          | 0.60            | 1.19 (0.43-3.34)  | 0.73            |
| 9-gene Exhausted CD8   | 0.50 (0.27-0.93)          | <b>0.028</b>    | 0.71 (0.37-1.34)  | 0.28            |
| Gender                 |                           |                 |                   |                 |
| Male                   | Ref                       |                 | Ref               |                 |
| Female                 | 6.09 (0.80-46.4)          | 0.081           | 3.63 (0.58-22.8)  | 0.17            |
| 9-gene Exhausted CD8   | 0.55 (0.30-1.02)          | <b>0.057</b>    | 0.56 (0.29-1.09)  | 0.09            |
| Etiology               |                           |                 |                   |                 |
| HBV                    | Ref                       |                 | Ref               |                 |
| HCV                    | 0.21 (0.03-1.75)          | 0.15            | 2.03 (0.37-11.1)  | 0.42            |
| Other                  | 0.51 (0.06-4.22)          | 0.53            | 1.65 (0.19-14.1)  | 0.65            |
| 9-gene Exhausted CD8   | 0.40 (0.22-0.75)          | <b>0.004</b>    | 0.52 (0.28-0.99)  | 0.04            |
| ALBI grade             |                           |                 |                   |                 |
| 1                      | Ref                       |                 | Ref               |                 |
| 2                      | 0.52 (0.17-1.61)          | 0.26            | 0.47 (0.14-1.58)  | 0.22            |
| 9-gene Exhausted CD8   | 0.47 (0.26-0.85)          | <b>0.013</b>    | 0.68 (0.38-1.22)  | 0.19            |
| NLR                    |                           |                 |                   |                 |
| ≤ 3                    | Ref                       |                 | Ref               |                 |
| > 3                    | 0.65 (0.24-1.80)          | 0.41            | 0.49 (0.15-1.62)  | 0.24            |
| 9-gene Exhausted CD8   | 0.47 (0.26-0.85)          | <b>0.012</b>    | 0.68 (0.39-1.19)  | 0.17            |
| AFP (ng/ml)            |                           |                 |                   |                 |
| ≤ 100                  | Ref                       |                 | Ref               |                 |
| > 100                  | 0.73 (0.28-1.93)          | 0.52            | 0.33 (0.10-1.12)  | 0.08            |
| 9-gene Exhausted CD8   | 0.48 (0.26-0.87)          | <b>0.016</b>    | 0.65 (0.36-1.18)  | 0.16            |
| Macrovascular invasion |                           |                 |                   |                 |
| No                     | Ref                       |                 | Ref               |                 |
| Yes                    | 1.62 (0.55-4.85)          | 0.38            | 1.83 (0.60-5.55)  | 0.29            |
| 9-gene Exhausted CD8   | 0.49 (0.27-0.88)          | <b>0.017</b>    | 0.66 (0.36-1.18)  | 0.16            |
| Extra-hepatic spread   |                           |                 |                   |                 |
| No                     | Ref                       |                 | Ref               |                 |
| Yes                    | 1.8e7 (0-Inf)             | 1.00            | 5.7e7 (0-Inf)     | 1.00            |
| 9-gene Exhausted CD8   | 0.48 (0.26-0.88)          | <b>0.017</b>    | 0.67 (0.36-1.23)  | 0.20            |
| Liver tumor > 50%      |                           |                 |                   |                 |
| No                     | Ref                       |                 | Ref               |                 |
| Yes                    | 1.1e10 (0-Inf)            | 1.00            | 13.5 (0.80-226.6) | 0.07            |
| 9-gene Exhausted CD8   | 0.49 (0.24-0.98)          | <b>0.044</b>    | 0.58 (0.27-1.23)  | 0.15            |
| Prior systemic therapy |                           |                 |                   |                 |
| None                   | Ref                       |                 | Ref               |                 |
| 1 or more lines        | 1.25 (0.34-4.54)          | 0.74            | 0.78 (0.17-3.58)  | 0.75            |

\* The result was in bold, if *p* < 0.05

**Supplementary Table 9.** Bivariate Cox regression analysis in the samples with combination regimen.

| Characteristics        | Progression-free survival |                 | Overall survival |                 |
|------------------------|---------------------------|-----------------|------------------|-----------------|
|                        | HR (95% IC)               | <i>p</i> value* | HR (95% IC)      | <i>p</i> value* |
| N = 20                 | Event = 15                |                 | Event = 10       |                 |
| 9-gene Exhausted CD8   | 0.49 (0.27-0.87)          | <b>0.015</b>    | 0.24 (0.09-0.64) | <b>0.0045</b>   |
| Age                    |                           |                 |                  |                 |
| ≤ 60                   | Ref                       |                 | Ref              |                 |
| > 60                   | 0.93 (0.32-2.65)          | 0.88            | 1.69 (0.40-7.13) | 0.48            |
| 9-gene Exhausted CD8   | 0.49 (0.28-0.88)          | <b>0.017</b>    | 0.29 (0.11-0.77) | <b>0.013</b>    |
| Gender                 |                           |                 |                  |                 |
| Male                   | Ref                       |                 | Ref              |                 |
| Female                 | 0.79 (0.09-6.61)          | 0.83            | 2.5e-8 (0-Inf)   | 0.99            |
| 9-gene Exhausted CD8   | 0.49 (0.28-0.87)          | <b>0.015</b>    | 0.26 (0.09-0.71) | <b>0.0083</b>   |
| Etiology               |                           |                 |                  |                 |
| HBV                    | Ref                       |                 | Ref              |                 |
| HCV                    | 0.64 (0.08-5.19)          | 0.67            | 0.79 (0.09-6.77) | 0.83            |
| Other                  | 2.07 (0.41-10.4)          | 0.38            | 1.21 (0.24-6.13) | 0.82            |
| 9-gene Exhausted CD8   | 0.49 (0.28-0.86)          | <b>0.014</b>    | 0.16 (0.04-0.59) | <b>0.006</b>    |
| ALBI grade             |                           |                 |                  |                 |
| 1                      | Ref                       |                 | Ref              |                 |
| 2                      | 1.21 (0.37-3.94)          | 0.76            | 8.41 (1.44-48.9) | <b>0.018</b>    |
| 9-gene Exhausted CD8   | 0.48 (0.27-0.85)          | <b>0.013</b>    | 0.19 (0.06-0.60) | <b>0.0045</b>   |
| NLR                    |                           |                 |                  |                 |
| ≤ 3                    | Ref                       |                 | Ref              |                 |
| > 3                    | 1.32 (0.46-3.75)          | 0.61            | 3.02 (0.68-13.3) | 0.14            |
| 9-gene Exhausted CD8   | 0.48 (0.27-0.84)          | <b>0.011</b>    | 0.24 (0.09-0.64) | <b>0.0042</b>   |
| AFP (ng/ml)            |                           |                 |                  |                 |
| ≤ 100                  | Ref                       |                 | Ref              |                 |
| > 100                  | 1.47 (0.47-4.56)          | 0.51            | 6.09 (1.30-28.5) | <b>0.022</b>    |
| 9-gene Exhausted CD8   | 0.44 (0.23-0.92)          | <b>0.010</b>    | 0.24 (0.08-0.68) | <b>0.0072</b>   |
| Macrovascular invasion |                           |                 |                  |                 |
| No                     | Ref                       |                 | Ref              |                 |
| Yes                    | 0.51 (0.16-1.66)          | 0.26            | 0.64 (0.16-2.62) | 0.53            |
| 9-gene Exhausted CD8   | 0.51 (0.29-.91)           | <b>0.022</b>    | 0.30 (0.11-0.81) | <b>0.018</b>    |
| Extra-hepatic spread   |                           |                 |                  |                 |
| No                     | Ref                       |                 | Ref              |                 |
| Yes                    | 2.07 (0.25-16.9)          | 0.50            | 8.9e7 (0-Inf)    | 1.00            |
| 9-gene Exhausted CD8   | 0.52 (0.30-0.91)          | <b>0.021</b>    | 0.27 (0.10-0.73) | <b>0.010</b>    |
| Liver tumor > 50%      |                           |                 |                  |                 |
| No                     | Ref                       |                 | Ref              |                 |
| Yes                    | 1.5e-8 (0-Inf)            | 1.00            | 2.9e-8 (0-Inf)   | 1.00            |
| 9-gene Exhausted CD8   | 0.38 (0.19-0.78)          | <b>0.009</b>    | 0.33 (0.12-0.88) | <b>0.027</b>    |
| Prior systemic therapy |                           |                 |                  |                 |
| None                   | Ref                       |                 | Ref              |                 |
| 1 or more lines        | 0.37 (0.08-1.69)          | 0.20            | 9.1e7 (0-Inf)    | 1.00            |

\* The result was in bold, if *p* < 0.05

**Supplementary Table 10.** Multivariate Cox regression analysis in the samples with single-agent regimen.

| Characteristics      | Progression-free survival |                 | Overall survival |                 |
|----------------------|---------------------------|-----------------|------------------|-----------------|
|                      | HR (95% IC)               | <i>p</i> value* | HR (95% IC)      | <i>p</i> value* |
| N = 22               | Event = 18                |                 | Event = 17       |                 |
| 9-gene Exhausted CD8 | 0.44 (0.22-0.88)          | <b>0.020</b>    | 0.71 (0.36-1.38) | 0.31            |
| Age                  |                           |                 |                  |                 |
| ≤ 60                 | Ref                       |                 | Ref              |                 |
| > 60                 | 0.83 (0.23-3.42)          | 0.86            | 0.78 (0.23-2.60) | 0.69            |
| ALBI grade           |                           |                 |                  |                 |
| 1                    | Ref                       |                 | Ref              |                 |
| 2                    | 0.59 (0.17-2.03)          | 0.40            | 0.75 (0.19-2.89) | 0.67            |
| NLR                  |                           |                 |                  |                 |
| ≤ 3                  | Ref                       |                 | Ref              |                 |
| > 3                  | 0.65 (0.15-2.73)          | 0.55            | 0.49 (0.13-1.89) | 0.30            |
| AFP (ng/ml)          |                           |                 |                  |                 |
| ≤ 100                | Ref                       |                 | Ref              |                 |
| > 100                | 0.89 (0.28-2.84)          | 0.85            | 0.37 (0.09-1.45) | 0.15            |

\* The result was in bold, if  $p < 0.05$

**Supplementary Table 11.** Multivariate Cox regression analysis in the samples with combination regimen.

| Characteristics      | Progression-free survival |                 | Overall survival |                 |
|----------------------|---------------------------|-----------------|------------------|-----------------|
|                      | HR (95% IC)               | <i>p</i> value* | HR (95% IC)      | <i>p</i> value* |
| N = 20               | Event = 15                |                 | Event = 10       |                 |
| 9-gene Exhausted CD8 | 0.47 (0.26-0.87)          | <b>0.015</b>    | 0.16 (0.05-0.59) | <b>0.0054</b>   |
| Age                  |                           |                 |                  |                 |
| ≤ 60                 | Ref                       |                 | Ref              |                 |
| > 60                 | 0.86 (0.26-2.90)          | 0.81            | 2.53 (0.41-15.7) | 0.32            |
| ALBI grade           |                           |                 |                  |                 |
| 1                    | Ref                       |                 | Ref              |                 |
| 2                    | 0.92 (0.23-3.71)          | 0.91            | 2.90 (0.43-19.8) | 0.28            |
| NLR                  |                           |                 |                  |                 |
| ≤ 3                  | Ref                       |                 | Ref              |                 |
| > 3                  | 1.52 (0.46-5.05)          | 0.49            | 1.37 (0.25-7.37) | 0.71            |
| AFP (ng/ml)          |                           |                 |                  |                 |
| ≤ 100                | Ref                       |                 | Ref              |                 |
| > 100                | 1.56 (0.41-5.95)          | 0.51            | 5.73 (0.64-51.4) | 0.12            |

\* The result was in bold, if  $p < 0.05$

**Supplementary Table 12. Clinical-pathologic characteristics of the primary-metastatic HCC cohort**

| Characteristics         | No. (%)           |
|-------------------------|-------------------|
| N                       | 31                |
| Age (years)             | 25-78 (median 48) |
| Sex                     |                   |
| Men                     | 27 (87.1)         |
| Women                   | 4 (12.9)          |
| Largest tumor diameter  |                   |
| ≤ 5 cm                  | 7 (22.5)          |
| > 5 cm & ≤ 10 cm        | 10 (32.3)         |
| > 10 cm                 | 14 (45.2)         |
| Tumor numbers           |                   |
| 1                       | 26 (83.9)         |
| 2                       | 3 (9.7)           |
| ≥ 3                     | 2 (6.4)           |
| Etiology                |                   |
| HBV                     | 26 (83.9)         |
| HCV                     | 3* (9.7)          |
| Other                   | 2 (6.4)           |
| Macrovascular invasion  |                   |
| No                      | 30 (96.9)         |
| Yes                     | 1 (3.1)           |
| Cirrhosis               |                   |
| No                      | 10 (32.3)         |
| Yes                     | 21 (67.7)         |
| Pathology stages (AJCC) |                   |
| I                       | 10 (32.3)         |
| II                      | 10 (32.3)         |
| III                     | 10 (32.3)         |
| IV                      | 1 (3.1)           |

\* One patient had both HBV and HCV infection.

## Supplementary Figures

### Supplementary Figure 1. Analysis flowchart of immune cell composition by using multiplex immunofluorescence staining

- Identification of the tumor parts of each specimen by the pathologist.
- Acquisition of multispectral images to cover the whole area of the specimens and normalization for exposure by using the Phenochart and the inForm software.
- Unmixing of the multispectral images to their component images by using the spectral libraries of each fluorophore.
- Selection of representative tumor images to establish the training algorithm
- Manual tissue segmentation (tumor, stroma, necrosis, and blank areas)
- Cell segmentation based on the nuclear DAPI staining.
- Cell phenotyping and measurement of proportions of different immune cells.

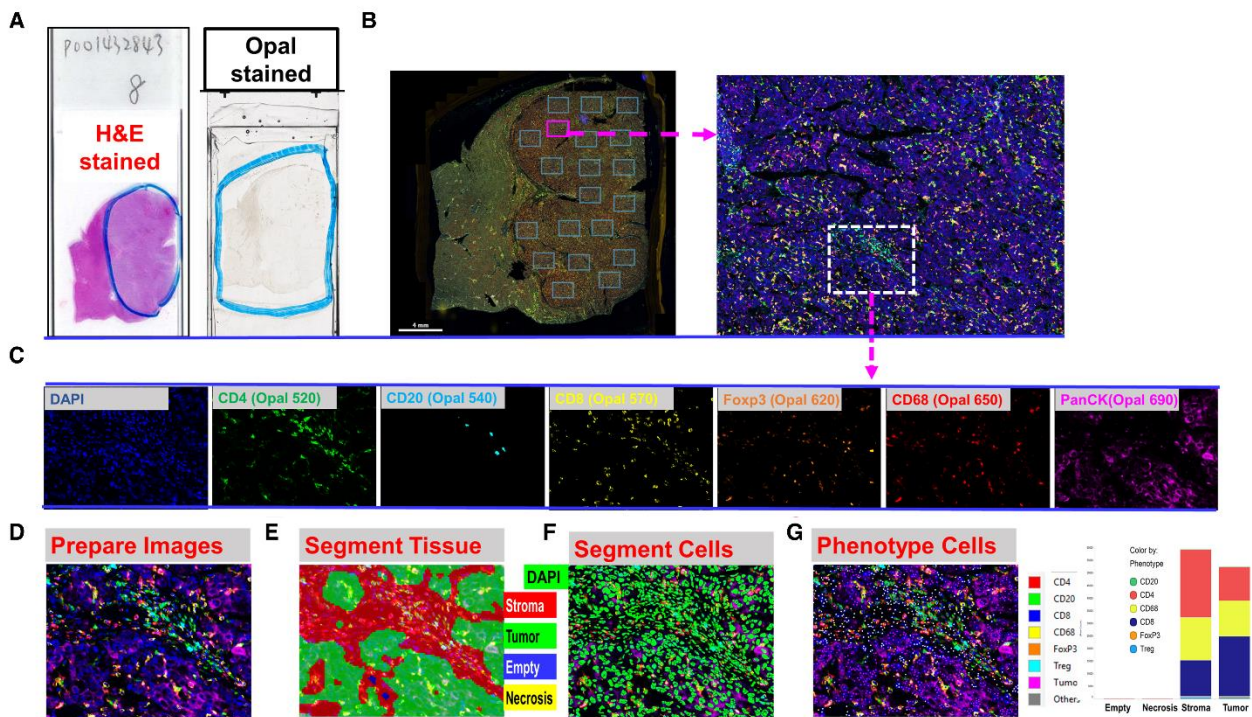

**Supplementary Figure 2.** PFS and OS curves of the ICI therapy discovery and validation cohorts

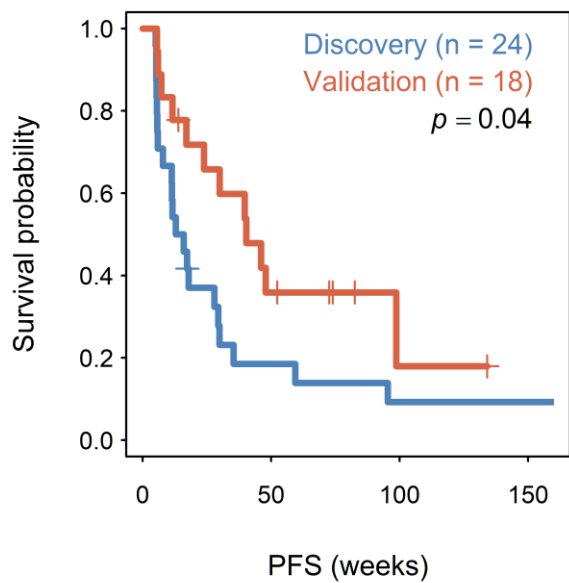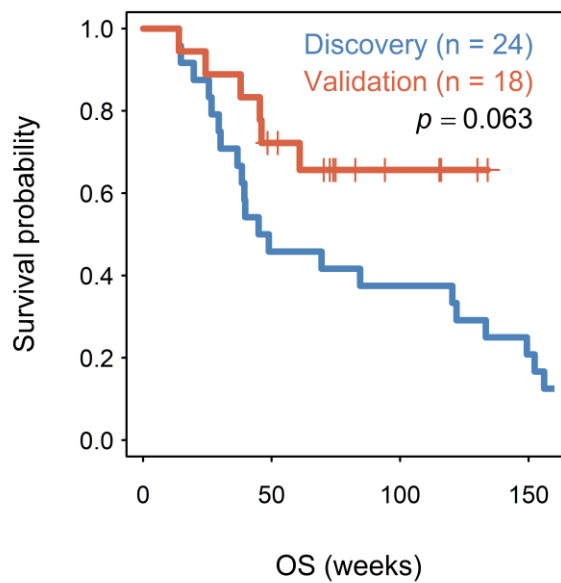

**Supplementary Figure 3. Predictive ability of T-cell signatures in the validation cohort**

(A) Bar plot depicting area under the receiver-operating characteristics (ROC) curve (AUC) for prediction of objective response by different immune cells in the ICI therapy validation cohort (n = 18). The performance of a random predictor (AUC = 0.5) was denoted by the dashed line.

(B) Forest plots showing hazard ratios of various immune cells for progress-free survival (PFS, left) and overall survival (OS, right) in the ICI therapy validation cohort (n = 18). Horizontal bars represented the 95% CIs of HR

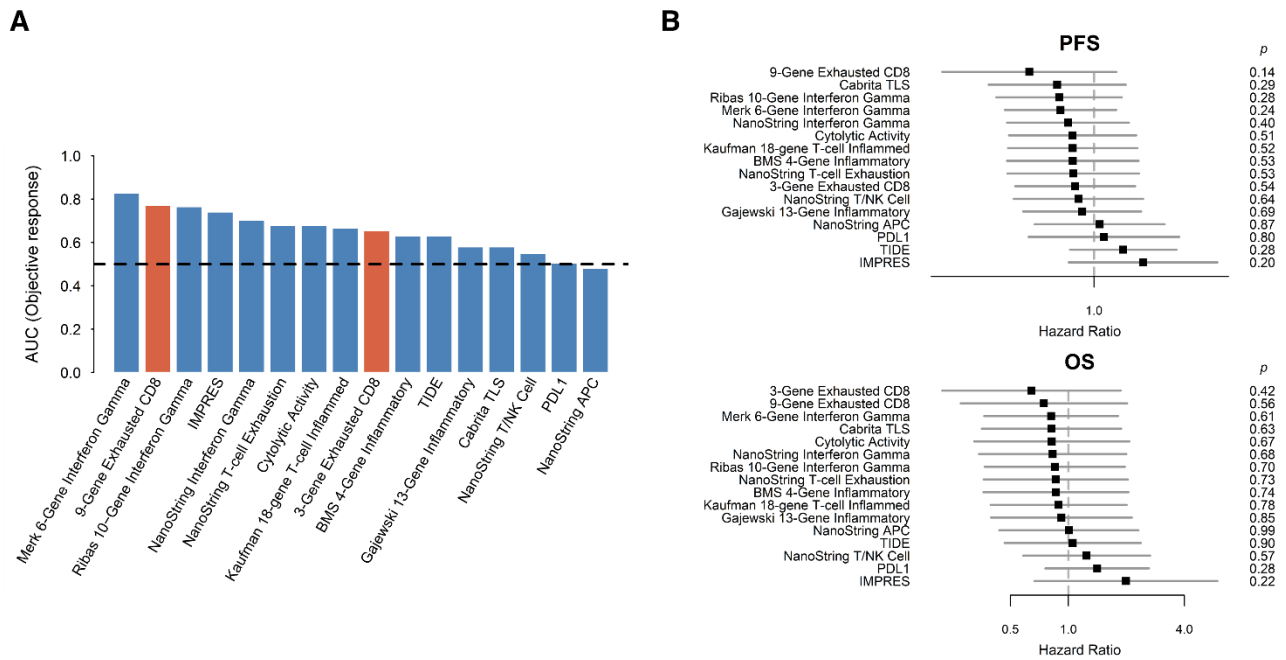



**Supplementary Figure 4. Association between 9-gene exhausted CD8 signature and  $\beta$ -catenin signaling**

(A) Representative images from the tumors with low (top) and high (bottom) nuclear  $\beta$ -catenin and cytoplasmic glutamine synthetase expression.

(B) The status of  $\beta$ -catenin in the ICI treatment cohort evaluated by Sanger sequencing and immunostaining. The aberrant  $\beta$ -catenin signaling is defined as one of positive of CTNNB1 mutation, expression of nuclear  $\beta$ -catenin and cytoplasmic glutamine synthetase.

(C) 9-gene exhausted CD8 signatures between samples without/with CTNNB1 mutations in TCGA-LIHC.

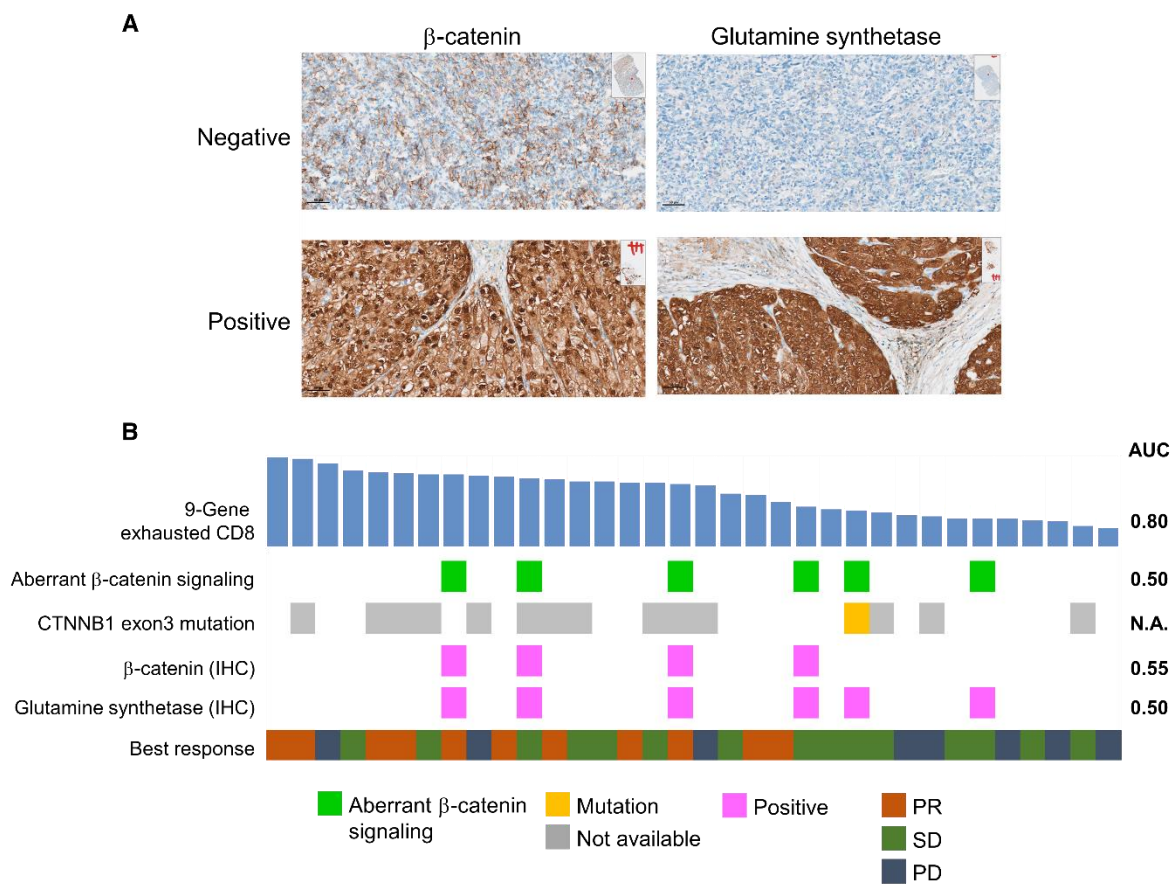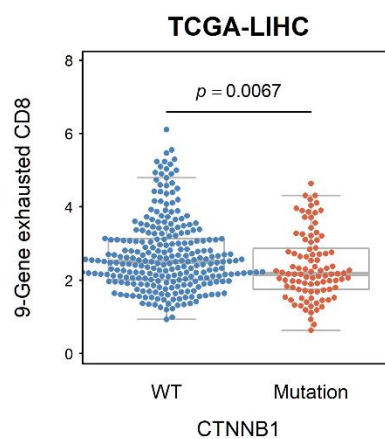

**Supplementary Figure 5. Association between 9-gene exhausted CD8 signature and other immune-based subtypes in HCC**

- (A) Cumulative CIBERSORT score for various types of immune cells in each sample. The order of samples was based on the 9-gene exhausted signature.
- (B) The correlation of CIBERSORT score for immune cells and 9-gene exhausted CD8 signature.
- (C) Distribution of 9-gene exhausted CD8 signature between samples in and not in the immune class defined by Sia and the colleagues (10).
- (D) Distribution of 9-gene exhausted CD8 signature among different immune subtypes defined by Thorsson and the colleagues (12).

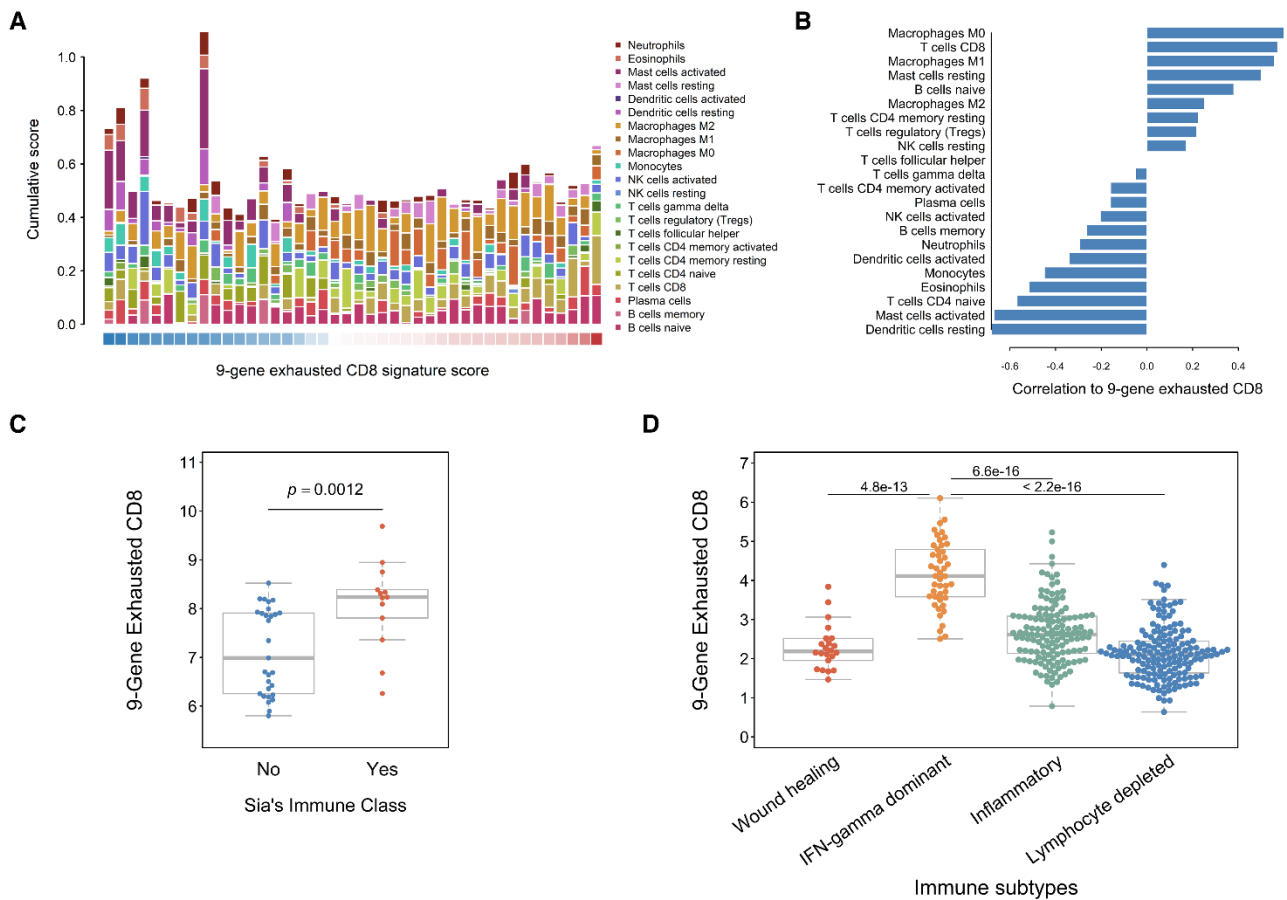

## **Supplementary References**

1. Jiang P, Gu S, Pan D, Fu J, Sahu A, Hu X, et al. Signatures of T cell dysfunction and exclusion predict cancer immunotherapy response. *Nat Med.* 2018;24(10):1550-8.
2. Auslander N, Zhang G, Lee JS, Frederick DT, Miao B, Moll T, et al. Robust prediction of response to immune checkpoint blockade therapy in metastatic melanoma. *Nat Med.* 2018;24(10):1545-9.
3. Danilova L, Wang H, Sunshine J, Kaunitz GJ, Cottrell TR, Xu H, et al. Association of PD-1/PD-L axis expression with cytolytic activity, mutational load, and prognosis in melanoma and other solid tumors. *Proc Natl Acad Sci U S A.* 2016;113(48):E7769-E77.
4. Spranger S, Bao R, Gajewski TF. Melanoma-intrinsic beta-catenin signalling prevents anti-tumour immunity. *Nature.* 2015;523(7559):231-5.
5. Ayers M, Lunceford J, Nebozhyn M, Murphy E, Loboda A, Kaufman DR, et al. IFN-gamma-related mRNA profile predicts clinical response to PD-1 blockade. *J Clin Invest.* 2017;127(8):2930-40.
6. Cabrita R, Lauss M, Sanna A, Donia M, Skaarup Larsen M, Mitra S, et al. Tertiary lymphoid structures improve immunotherapy and survival in melanoma. *Nature.* 2020;577(7791):561-5.
7. Cristescu R, Mogg R, Ayers M, Albright A, Murphy E, Yearley J, et al. Pan-tumor genomic biomarkers for PD-1 checkpoint blockade-based immunotherapy. *Science.* 2018;362(6411).
8. Sangro B, Melero I, Wadhawan S, Finn RS, Abou-Alfa GK, Cheng AL, et al. Association of inflammatory biomarkers with clinical outcomes in nivolumab-treated patients with advanced hepatocellular carcinoma. *J Hepatol.* 2020;73(6):1460-9.
9. Huang WJ, Tsai JH, Jeng YM. Complementary roles of beta-catenin and glutamine synthetase immunostaining in diagnosis of chemotherapy-treated and untreated hepatoblastoma. *J Formos Med Assoc.* 2017;116(7):549-53.
10. Sia D, Jiao Y, Martinez-Quetglas I, Kuchuk O, Villacorta-Martin C, Castro de Moura M, et al. Identification of an Immune-specific Class of Hepatocellular Carcinoma, Based on Molecular Features. *Gastroenterology.* 2017;153(3):812-26.
11. Newman AM, Liu CL, Green MR, Gentles AJ, Feng W, Xu Y, et al. Robust enumeration of cell subsets from tissue expression profiles. *Nat Methods.* 2015;12(5):453-7.
12. Thorsson V, Gibbs DL, Brown SD, Wolf D, Bortone DS, Ou Yang TH, et al. The Immune Landscape of Cancer. *Immunity.* 2018;48(4):812-30 e14.
